# Supplementary material for: Weed Spectrum in Durum Wheat under Different Soil Tillage and Fertilizer Application in Mediterranean Environment
Source: MDPI journal article supplement (doi:10.3390/su13137307), 2021-06-30
Supplement: s1 [file s1]

**Supplementary Materials:** Table S1: Analysis of variance summary of weed characteristics and durum wheat yield and straw across the field experiments in the 2013/2014 and 2014/2015 growing seasons.

| Source of variations        | <i>d.f.</i> | Weed density<br>(plants m <sup>-2</sup> ) | Weed<br>biomass<br>(g m <sup>-2</sup> ) | Annual<br>weeds<br>(plants m <sup>-2</sup> ) | Perennial<br>weeds<br>(plants m <sup>-2</sup> ) | Monocots<br>weeds<br>(plants m <sup>-2</sup> ) | Dicots weeds<br>(plants m <sup>-2</sup> ) | Grain yield<br>(g m <sup>-2</sup> ) | Wheat straw<br>(g m <sup>-2</sup> ) |
|-----------------------------|-------------|-------------------------------------------|-----------------------------------------|----------------------------------------------|-------------------------------------------------|------------------------------------------------|-------------------------------------------|-------------------------------------|-------------------------------------|
| Soil tillage (A)            | 2           | 0.0167*                                   | 0.0224*                                 | 0.0464*                                      | 0.0380*                                         | 0.0306*                                        | <0.001***                                 | 0.0407*                             | 0.0084**                            |
| Fertilization source<br>(B) | 1           | <0.0001***                                | 0.0357*                                 | 0.1709 <sup>ns</sup>                         | <0.0001***                                      | 0.2425 <sup>ns</sup>                           | <0.001***                                 | <0.0001***                          | <0.0001***                          |
| A × B                       | 2           | 0.0012**                                  | 0.0492*                                 | 0.5066 <sup>ns</sup>                         | 0.0454*                                         | 0.8565 <sup>ns</sup>                           | 0.0046**                                  | 0.0564 <sup>ns</sup>                | 0.4611 <sup>ns</sup>                |
| Year (C)                    | 1           | 0.0152*                                   | 0.0602 <sup>ns</sup>                    | 0.2336 <sup>ns</sup>                         | 0.4991 <sup>ns</sup>                            | 0.3362 <sup>ns</sup>                           | 0.0460*                                   | 0.0515 <sup>ns</sup>                | 0.0598 <sup>ns</sup>                |
| A × C                       | 2           | 0.0834 <sup>ns</sup>                      | 0.0350*                                 | 0.1884 <sup>ns</sup>                         | 0.2837 <sup>ns</sup>                            | 0.2960 <sup>ns</sup>                           | 0.0527 <sup>ns</sup>                      | 0.2729 <sup>ns</sup>                | 0.2214 <sup>ns</sup>                |
| B × C                       | 2           | 0.0647 <sup>ns</sup>                      | 0.0693 <sup>ns</sup>                    | 0.3615 <sup>ns</sup>                         | 0.3150 <sup>ns</sup>                            | 0.5924 <sup>ns</sup>                           | 0.0759 <sup>ns</sup>                      | 0.0094**                            | 0.0160*                             |
| A × B × C                   | 2           | 0.0468*                                   | 0.0297*                                 | 0.7019 <sup>ns</sup>                         | 0.5342 <sup>ns</sup>                            | 0.9842 <sup>ns</sup>                           | 0.2244 <sup>ns</sup>                      | 0.0082**                            | 0.0014**                            |
